# Supplementary material
Source: PubMed Central journal article supplement (PMC2792588)

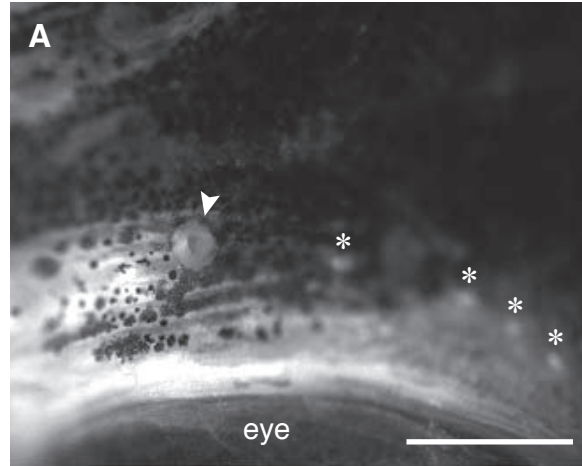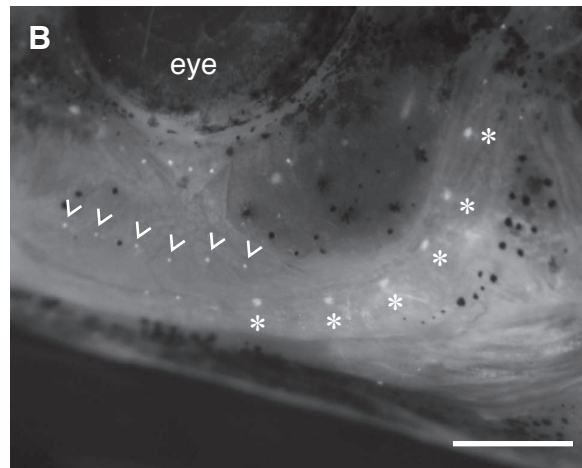

Supplement: supp_213_1_108__1.pdf [file supp_213_1_108__1.pdf]

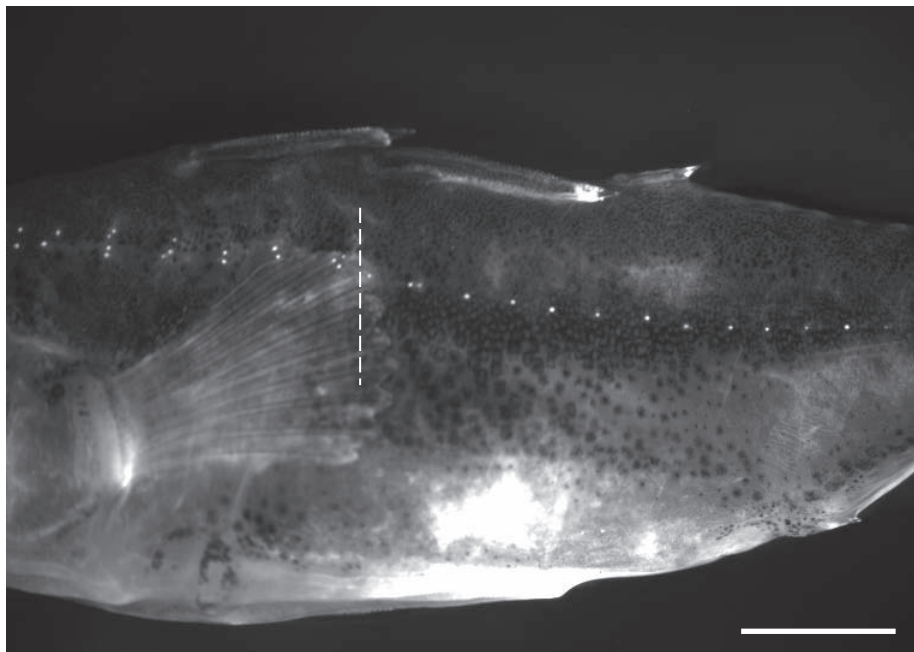

Supplement: supp_213_1_108__2.pdf [file supp_213_1_108__2.pdf]
